# Supplementary material for: Mechanistic aspects of acetone addition to metalloaromatic complexes of iridium: a DFT investigationElectronic supplementary information (ESI) available: selected geometric data, calculated structures of all complexes and full computational details. See http://www.rsc.org/suppdata/cc/b2/b210622a/.
Source: Royal Society of Chemistry journal article supplement (doi:10.1039/b210622a), 2002-12-03
Supplement: b210622a.pdf [file b210622a.pdf]

# **Electronic Supplementary Information**

## **Mechanistic Aspects of Acetone Addition to Metalloaromatic Complexes of Iridium: A DFT Investigation**

Mark A. Iron, Jan M. L. Martin,\* and  
Milko E. van der Boom\*

Department of Organic Chemistry,  
Weizmann Institute of Science,  
76100 Rehovot, Israel.

\*Corresponding authors, e-mail: [comartin@wicc.weizmann.ac.il](mailto:comartin@wicc.weizmann.ac.il)  
[milko.vanderboom@weizmann.ac.il](mailto:milko.vanderboom@weizmann.ac.il)

## **Computational Details:**

All calculations were carried out using Gaussian 98 Revision A11<sup>1</sup> running on Compaq ES40 and XP1000 workstations in our group, on the SGI Origin computers of the Faculty of Chemistry and the (Israel) Inter-University Computing Center and on a mini-farm belonging to our group consisting of four Intel Pentium IV and four Intel dual Xeon 2.0 GHz PC's running Red Hat Linux 7.2.

The mPW1K (modified Perdew-Wang 1-parameter for kinetics) DFT exchange-correlation functional of Truhlar and coworkers<sup>2</sup> was used to investigate the reaction. This functional is based on the Perdew-Wang exchange functional<sup>3</sup> with Adamo and Barone's modified enhancement factor<sup>4</sup> and the Perdew-Wang correlation functional.<sup>3</sup> A larger percentage of Hartree-Fock exchange has been introduced<sup>2</sup> to circumvent the underestimated barrier heights typical of standard exchange-correlation functionals. It has been shown (e.g., refs<sup>2,5-7</sup>) that this functional generally yields much more reliable reaction barrier heights than B3LYP or other "conventional" exchange-correlation functionals. With this functional, two basis set-RECP (relativistic effective core potential) combinations were used. The first, denoted SDD, is the combination of the Huzinaga-Dunning double- $\zeta$  basis set on lighter elements with the Stuttgart-Dresden basis set-RECP combination<sup>8</sup> on transition metals. The second, denoted SDB-cc-pVDZ, combines the Dunning cc-pVDZ basis set<sup>9</sup> on the main group elements and the Stuttgart-Dresden basis set-RECP on the transition metals with an added  $f$ -type polarisation exponent taken as the geometric average of the two  $f$ -exponents given in the Appendix to Ref.<sup>10</sup> Geometry optimisations were carried out using the former basis set while the energetics of the reaction were calculated at these geometries with the latter basis set; this level of theory is conventionally denoted as mPW1K/SDB-cc-pVDZ//mPW1K/SDD. We have previously recommended this level of theory as better suited than the more popular B3LYP<sup>11,12</sup>/LANL2DZ<sup>13</sup> to investigate reaction mechanisms.<sup>7</sup> Since Gaussian 98 uses the same number of radial grid points throughout the periodic table, the "ultrafine" grid, i.e., a pruned (99,590) grid, was used throughout the calculations as recommended in Ref.<sup>14</sup> The identities of the transition states were confirmed by performing intrinsic reaction coordinate(IRC) calculations.<sup>15-17</sup>

<sup>1</sup> M. J. Frisch, G. W. Trucks, H. B. Schlegel, G. E. Scuseria, M. A. Robb, J. R. Cheeseman, V. G. Zakrzewski, J. J. A. Montgomery, R. E. Stratmann, J. C. Burant, S. Dapprich, J. M. Millam, A. D. Daniels, K. N. Kudin, M. C. Strain, O. Farkas, J. Tomasi, V. Barone, M. Cossi, R. Cammi, B. Mennucci, C. Pomelli, C. Adamo, S. Clifford, J. Ochterski, G. A. Petersson, P. Y. Ayala, Q. Cui, K. Morokuma, P. Salvador, J. J. Dannenberg, D. K. Malick, A. D. Rabuck, K. Raghavachari, J. B. Foresman, J. Cioslowski, J. V. Ortiz, A. G. Baboul, B. B. Stefanov, G. Liu, A. Liashenko, P. Piskorz, I. Komaromi, R. Gomperts, R. L. Martin, D. J. Fox, T. Keith, M. A. Al-Laham, C. Y. Peng, A. Nanayakkara, M. Challacombe, P. M. W. Gill, B. Johnson, W. Chen, M. W. Wong, J. L. Andres, C. Gonzalez, M. Head-Gordon, E. S. Replogle, and J. A. Pople, in 'Gaussian 98, Revision A.11', Pittsburgh PA, 2001.

<sup>2</sup> B. J. Lynch, P. L. Fast, M. Harris, and D. G. Truhlar, *J. Phys. Chem. A*, 2000, **104**, 4811.

<sup>3</sup> J. P. Perdew, J. A. Chevary, S. H. Vosko, K. A. Jackson, M. R. Perderson, D. J. Singh, and C. Fiolhais, *Physical Reviews B*, 1992, **46**, 6771.

<sup>4</sup> C. Adamo and V. Barone, *J. Chem. Phys.*, 1998, **108**, 664.

<sup>5</sup> B. J. Lynch and D. G. Truhlar, *Journal of Physical Chemistry A*, 2001, **105**, 2936.

- <sup>6</sup> S. Parthiban, G. de Oliveira, and J. M. L. Martin, *J. Phys. Chem. A*, 2001, **105**, 895.
- <sup>7</sup> M. A. Iron, H. C. Lo, J. M. L. Martin, and E. Keinan, *Journal of the American Chemical Society*, 2002, **124**, 7041.
- <sup>8</sup> M. Dolg, ed. J. Grotendorst, 2000.
- <sup>9</sup> T. H. Dunning Jr., *Journal of Chemical Physics*, 1989, **90**, 1007.
- <sup>10</sup> J. M. L. Martin and A. Sundermann, *Journal of Chemical Physics*, 2001, **114**, 3408.
- <sup>11</sup> A. D. Becke, *J. Chem. Phys.*, 1993, **98**, 5648.
- <sup>12</sup> P. J. Stevens, F. J. Devlin, C. F. Chabalowski, and M. J. Frisch, *J. Phys. Chem.*, 1994, **98**, 11623.
- <sup>13</sup> P. J. Hay and W. R. Wadt, *J. Chem. Phys.*, 1985, **82**, 299.
- <sup>14</sup> J. M. L. Martin, C. W. Bauschlicher, and A. Ricca, *Computer Physics Communications*, 2001, **133**, 189.
- <sup>15</sup> K. Fukui, *Accounts of Chemical Research*, 1981, **14**, 363.
- <sup>16</sup> C. Gonzalez and H. B. Schlegel, *Journal of Chemical Physics*, 1989, **90**, 2154.
- <sup>17</sup> C. Gonzalez and H. B. Schlegel, *Journal of Physical Chemistry*, 1990, **94**, 5523.

## Key Geometric Data for Calculated Structures:

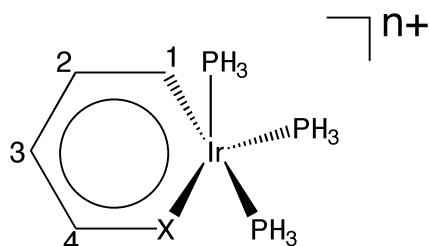

**3C:** X = CH, n = 0

**3O:** X = O, n = 1

**3S:** X = S, n = 1

| <b>Bond Length (Å) /<br/>Angle (°)</b> | <b>3C</b> | <b>3O</b> | <b>3S</b> |
|----------------------------------------|-----------|-----------|-----------|
| Ir—C1                                  | 1.970     | 1.957     | 1.985     |
| C1—C2                                  | 1.395     | 1.395     | 1.380     |
| C2—C3                                  | 1.398     | 1.407     | 1.421     |
| C3—C4                                  | 1.398     | 1.382     | 1.366     |
| C4—X                                   | 1.395     | 1.308     | 1.375     |
| Ir—X                                   | 1.970     | 1.997     | 2.310     |
| Ir—C3                                  | 3.465     | 3.400     | 3.602     |
| Ir—C1—C2                               | 130.2     | 125.2     | 131.2     |
| C1—C2—C3                               | 123.8     | 126.8     | 129.0     |
| C2—C3—C4                               | 123.2     | 123.0     | 126.8     |
| C3—C4—X                                | 123.8     | 124.2     | 126.5     |
| C4—X—Ir                                | 130.2     | 129.9     | 112.7     |
| C1—Ir—X                                | 87.5      | 89.8      | 92.6      |

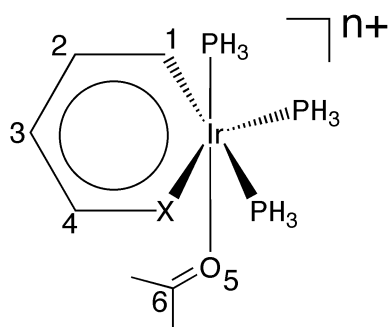

**4C:** X = CH, n = 0

**4O:** X = O, n = 1

**4S:** X = S, n = 1

| Bond Length (Å) /<br>Angle (°) | 4C    | 4O    | 4S    |
|--------------------------------|-------|-------|-------|
| Ir—C1                          | 1.969 | 2.035 | 2.040 |
| C1—C2                          | 1.396 | 1.357 | 1.356 |
| C2—C3                          | 1.398 | 1.451 | 1.454 |
| C3—C4                          | 1.398 | 1.358 | 1.351 |
| C4—X                           | 1.396 | 1.345 | 1.777 |
| Ir—X                           | 1.969 | 2.030 | 2.392 |
| Ir—O5                          | 3.991 | 2.131 | 2.140 |
| O5—C6                          | 1.241 | 1.256 | 1.256 |
| C3—C6                          | 5.250 | 4.423 | 4.693 |
| Ir—C1—C2                       | 130.2 | 123.5 | 129.6 |
| C1—C2—C3                       | 123.9 | 126.3 | 129.0 |
| C2—C3—C4                       | 123.2 | 124.7 | 128.1 |
| C3—C4—X                        | 123.9 | 126.8 | 128.5 |
| C4—X—Ir                        | 130.2 | 124.7 | 108.3 |
| C1—Ir—X                        | 87.7  | 91.6  | 93.8  |
| Ir—O5—C6                       | 76.9  | 137.4 | 138.0 |
| C3—C6—O5                       | 126.4 | 76.2  | 76.4  |
| C1—Ir—O5                       | 100.1 | 92.6  | 93.2  |
| X—Ir—O5                        | 100.1 | 91.4  | 92.3  |

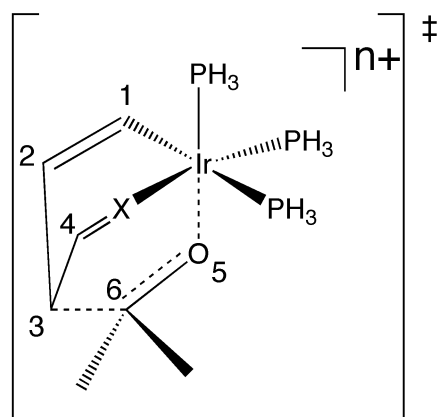

**5C:** X = CH, n = 0

**5O:** X = O, n = 1

**5S:** X = S, n = 1

| Bond Length (Å) /<br>Angle (°) | <b>5C</b> | <b>5O</b> | <b>5S</b> |
|--------------------------------|-----------|-----------|-----------|
| Ir—C1                          | 2.012     | 2.026     | 2.033     |
| C1—C2                          | 1.371     | 1.347     | 1.342     |
| C2—C3                          | 1.419     | 1.464     | 1.477     |
| C3—C4                          | 1.419     | 1.391     | 1.392     |
| C4—X                           | 1.371     | 1.301     | 1.718     |
| Ir—X                           | 2.011     | 2.056     | 2.411     |
| Ir—O5                          | 2.411     | 2.107     | 2.092     |
| O5—C6                          | 1.277     | 1.313     | 1.325     |
| C3—C6                          | 2.689     | 2.258     | 2.090     |
| Ir—C1—C2                       | 124.1     | 119.6     | 122.2     |
| C1—C2—C3                       | 125.1     | 124.0     | 125.2     |
| C2—C3—C4                       | 122.0     | 120.8     | 121.0     |
| C3—C4—X                        | 125.1     | 125.2     | 126.3     |
| C4—X—Ir                        | 124.1     | 119.8     | 102.1     |
| C1—Ir—X                        | 90.4      | 89.7      | 89.9      |
| Ir—O5—C6                       | 128.0     | 129.6     | 131.1     |
| C3—C6—O5                       | 101.0     | 102.7     | 105.3     |
| C1—Ir—O5                       | 83.0      | 89.9      | 90.0      |
| X—Ir—O5                        | 83.0      | 81.0      | 82.7      |

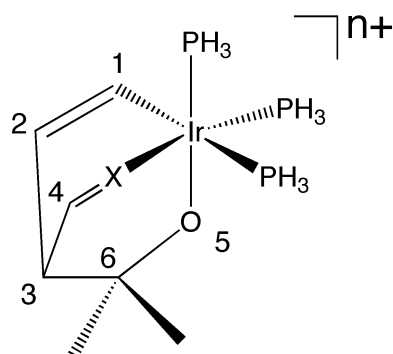

**6C**: X = CH, n = 0

**6O**: X = O, n = 1

**6S**: X = S, n = 1

| Bond Length (Å) /<br>Angle (°) | <b>6C</b> | <b>6O</b> | <b>6S</b> |
|--------------------------------|-----------|-----------|-----------|
| Ir—C1                          | 2.036     | 2.028     | 2.034     |
| C1—C2                          | 1.340     | 1.341     | 1.339     |
| C2—C3                          | 1.515     | 1.519     | 1.520     |
| C3—C4                          | 1.515     | 1.489     | 1.482     |
| C4—X                           | 1.340     | 1.255     | 1.667     |
| Ir—X                           | 2.356     | 2.088     | 2.399     |
| Ir—O5                          | 2.052     | 2.038     | 2.045     |
| O5—C6                          | 1.434     | 1.433     | 1.426     |
| C3—C6                          | 1.563     | 1.579     | 1.585     |
| Ir—C1—C2                       | 118.4     | 117.5     | 120.1     |
| C1—C2—C3                       | 119.8     | 120.3     | 121.7     |
| C2—C3—C4                       | 109.0     | 107.1     | 108.8     |
| C3—C4—X                        | 119.8     | 122.2     | 124.8     |
| C4—X—Ir                        | 118.4     | 117.9     | 101.2     |
| C1—Ir—X                        | 86.5      | 85.8      | 87.7      |
| Ir—O5—C6                       | 121.9     | 121.8     | 124.4     |
| C3—C6—O5                       | 111.2     | 110.8     | 111.5     |
| C1—Ir—O5                       | 87.6      | 89.9      | 90.6      |
| X—Ir—O5                        | 87.6      | 85.3      | 85.9      |

## Cartesian Coordinates of Calculated Structures:

Geometry of complex: 3C

-----

23

Stoichiometry = C<sub>5</sub>H<sub>14</sub>IrP<sub>3</sub>

|    |           |           |           |
|----|-----------|-----------|-----------|
| H  | -0.838610 | 0.471205  | -2.436350 |
| C  | -1.187523 | 0.466486  | -1.397894 |
| C  | -2.643063 | 0.631178  | 1.151141  |
| Ir | 0.141352  | 0.079413  | 0.004256  |
| C  | -2.569353 | 0.631729  | -1.307149 |
| C  | -3.268035 | 0.690204  | -0.097835 |
| C  | -1.269150 | 0.465876  | 1.324442  |
| H  | -0.639229 | -2.820341 | -1.095796 |
| H  | -3.138572 | 0.769474  | -2.219768 |
| H  | -4.340779 | 0.836015  | -0.129968 |
| H  | -0.983083 | 0.470124  | 2.381939  |
| H  | -3.265940 | 0.768521  | 2.028078  |
| H  | 1.167537  | -3.115991 | 0.034329  |
| P  | 0.044882  | -2.233584 | 0.000841  |
| H  | -0.703742 | -2.820820 | 1.054225  |
| P  | 1.833647  | 0.406172  | -1.672475 |
| P  | 1.730139  | 0.405391  | 1.779518  |
| H  | 2.762676  | 1.471534  | -1.503028 |
| H  | 1.329859  | 0.769680  | -2.951374 |
| H  | 2.785946  | -0.567432 | -2.113463 |
| H  | 2.667643  | 1.470812  | 1.666519  |
| H  | 2.654314  | -0.568429 | 2.276332  |
| H  | 1.150626  | 0.768332  | 3.026098  |

Geometry of complex: 3O

-----

22

Stoichiometry = C<sub>4</sub>H<sub>13</sub>IrOP<sub>3</sub>

|    |           |           |           |
|----|-----------|-----------|-----------|
| H  | 1.155675  | 0.395500  | 3.088293  |
| O  | -1.153335 | 0.432837  | -1.423041 |
| C  | -2.614369 | 0.708352  | 1.049711  |
| Ir | 0.140448  | 0.106568  | 0.063170  |
| C  | -2.455241 | 0.553478  | -1.390568 |
| C  | -3.192563 | 0.709335  | -0.232590 |
| C  | -1.282999 | 0.435087  | 1.365165  |
| H  | -0.694861 | -2.703450 | -1.030800 |
| H  | -2.932136 | 0.567588  | -2.361349 |
| H  | -4.253250 | 0.871440  | -0.332564 |
| H  | -1.081535 | 0.397584  | 2.433984  |
| H  | -3.279254 | 0.946382  | 1.870920  |
| H  | 1.331822  | -2.904118 | -0.199049 |
| P  | 0.126671  | -2.189690 | -0.003197 |
| H  | -0.398836 | -2.822066 | 1.143222  |
| P  | 1.778549  | 0.348755  | -1.766158 |
| P  | 1.706774  | 0.307274  | 1.789012  |
| H  | 2.714043  | 1.408840  | -1.702327 |
| H  | 1.090858  | 0.667766  | -2.957982 |
| H  | 2.635961  | -0.686003 | -2.220714 |
| H  | 2.528398  | 1.457490  | 1.763079  |
| H  | 2.686427  | -0.697974 | 1.980396  |



Geometry of complex: 3S

22

Stoichiometry = C4H13IrP3S1

|    |           |           |           |
|----|-----------|-----------|-----------|
| H  | 0.728697  | 0.871484  | 2.840339  |
| S  | -0.832485 | 1.453733  | -1.299236 |
| C  | -2.691574 | 0.269595  | 1.101673  |
| Ir | 0.115507  | -0.238322 | -0.045047 |
| C  | -2.333960 | 2.017494  | -0.638420 |
| C  | -3.050674 | 1.430127  | 0.365146  |
| C  | -1.516893 | -0.453450 | 1.064177  |
| H  | 0.780462  | -3.416691 | -0.197043 |
| H  | -2.712399 | 2.898967  | -1.131325 |
| H  | -3.997907 | 1.887811  | 0.613618  |
| H  | -1.506874 | -1.261585 | 1.795471  |
| H  | -3.455938 | -0.086357 | 1.781837  |
| H  | 2.140858  | -2.532959 | 1.246034  |
| P  | 0.829260  | -2.358277 | 0.739926  |
| H  | 0.060536  | -2.899655 | 1.796589  |
| P  | 1.902155  | -0.164566 | -1.741294 |
| P  | 1.213298  | 1.005207  | 1.522627  |
| H  | 3.245926  | 0.116646  | -1.386427 |
| H  | 1.691972  | 0.807732  | -2.746879 |
| H  | 2.105532  | -1.319301 | -2.533946 |
| H  | 1.129653  | 2.396835  | 1.307929  |
| H  | 2.603102  | 0.810085  | 1.695886  |

Geometry of complex: 4C

33

Stoichiometry = C8H20IrOP3

|    |           |           |           |
|----|-----------|-----------|-----------|
| C  | 0.290834  | 1.467296  | -1.227760 |
| Ir | 0.559063  | 0.003244  | 0.061799  |
| O  | -2.831133 | -2.033174 | -0.473398 |
| C  | -3.216117 | -0.854675 | -0.422035 |
| C  | -3.295123 | 0.000856  | -1.653404 |
| C  | -0.006642 | 1.252445  | 1.475267  |
| C  | -0.227947 | 2.630062  | 1.425519  |
| C  | -0.190155 | 3.383470  | 0.248039  |
| C  | 0.040393  | 2.823863  | -1.012593 |
| P  | 2.857392  | 0.078117  | 0.320794  |
| P  | 0.075499  | -1.796039 | 1.591790  |
| P  | 0.448763  | -1.526587 | -1.798176 |
| C  | -3.574043 | -0.200736 | 0.881305  |
| H  | 0.261801  | -0.903596 | -3.062847 |
| H  | 3.329777  | 0.696009  | 1.508470  |
| H  | -0.478797 | 3.151302  | 2.343102  |
| H  | -0.386305 | 4.446794  | 0.310972  |
| H  | 0.432074  | 1.236413  | -2.289649 |
| H  | -0.015114 | 3.486182  | -1.869813 |
| H  | 3.724465  | -1.056798 | 0.324451  |
| H  | 3.564155  | 0.868275  | -0.623462 |
| H  | -0.983661 | -2.674777 | 1.240665  |
| H  | -0.391008 | -1.374917 | 2.867522  |
| H  | 1.007606  | -2.781242 | 2.045393  |
| H  | -0.645833 | -2.431229 | -1.825888 |
| H  | 1.473860  | -2.444590 | -2.187600 |
| H  | -4.243466 | 0.533378  | -1.703279 |
| H  | -3.164693 | -0.603702 | -2.545762 |
| H  | -2.496571 | 0.743052  | -1.601092 |

|   |           |           |          |
|---|-----------|-----------|----------|
| H | -3.629396 | -0.939433 | 1.675074 |
| H | -4.519633 | 0.333905  | 0.807557 |
| H | -2.795785 | 0.526496  | 1.119487 |
| H | -0.094282 | 0.856238  | 2.493208 |

Geometry of complex: 40

32

Stoichiometry = C7H19IrO2P3

|    |           |           |           |
|----|-----------|-----------|-----------|
| H  | 0.733211  | -1.450958 | -3.000050 |
| O  | -0.014408 | 1.181015  | 1.379862  |
| C  | 0.126814  | 2.506930  | -1.300303 |
| Ir | 0.339386  | -0.217139 | -0.049168 |
| C  | 0.066090  | 2.509902  | 1.188409  |
| C  | 0.139679  | 3.157767  | -0.003010 |
| C  | 0.179376  | 1.170781  | -1.528865 |
| H  | 2.609962  | 1.838689  | 0.321564  |
| H  | 0.048460  | 3.069030  | 2.115226  |
| H  | 0.177614  | 4.235143  | 0.024487  |
| H  | 0.152416  | 0.843014  | -2.565127 |
| H  | 0.056207  | 3.170216  | -2.154501 |
| H  | 3.411426  | -0.127358 | 0.943709  |
| P  | 2.534565  | 0.465646  | 0.006221  |
| H  | 3.277149  | 0.365686  | -1.188418 |
| P  | 0.418150  | -1.695587 | 1.922258  |
| P  | 0.588837  | -1.897066 | -1.664564 |
| H  | -0.538021 | -2.731126 | 2.062113  |
| H  | 0.173403  | -0.939025 | 3.091054  |
| H  | 1.586924  | -2.401089 | 2.302463  |
| H  | -0.520350 | -2.765937 | -1.778092 |
| H  | 1.653063  | -2.825311 | -1.577658 |
| O  | -1.731088 | -0.710631 | -0.155524 |
| C  | -2.830702 | -0.119685 | -0.016343 |
| C  | -4.079924 | -0.910622 | -0.205591 |
| C  | -2.940476 | 1.318908  | 0.340837  |
| H  | -3.950250 | 1.685437  | 0.191801  |
| H  | -2.232903 | 1.915817  | -0.227494 |
| H  | -2.670068 | 1.442432  | 1.389832  |
| H  | -3.865689 | -1.960385 | -0.368345 |
| H  | -4.629002 | -0.514722 | -1.060859 |
| H  | -4.730719 | -0.791718 | 0.660042  |

Geometry of complex: 4S

32

Stoichiometry = C7H19IrOP3S1

|    |           |           |           |
|----|-----------|-----------|-----------|
| C  | 0.027080  | 0.914902  | -1.685891 |
| Ir | 0.324518  | -0.296804 | -0.072395 |
| O  | -1.750098 | -0.797825 | 0.085319  |
| C  | -2.853855 | -0.200494 | 0.141698  |
| C  | -2.999336 | 1.275960  | 0.044873  |
| S  | 0.112884  | 1.486498  | 1.507055  |
| C  | 0.248917  | 3.027226  | 0.632338  |
| C  | 0.220802  | 3.243234  | -0.700999 |
| C  | 0.045121  | 2.268128  | -1.764653 |
| P  | 2.514036  | 0.374862  | -0.247500 |
| P  | 0.581590  | -1.692993 | 1.934063  |
| P  | 0.439199  | -2.140642 | -1.554838 |

|   |           |           |           |
|---|-----------|-----------|-----------|
| C | -4.084447 | -1.022957 | 0.329415  |
| H | 0.379359  | -1.828047 | -2.934455 |
| H | 2.632982  | 1.775610  | -0.351734 |
| H | 0.352053  | 3.863045  | 1.308093  |
| H | 0.306694  | 4.273334  | -1.019777 |
| H | -0.148148 | 0.411524  | -2.635659 |
| H | -0.106994 | 2.707233  | -2.744223 |
| H | 3.382560  | 0.059200  | 0.821060  |
| H | 3.248843  | -0.085900 | -1.363677 |
| H | -0.318487 | -2.771653 | 2.111895  |
| H | 0.402332  | -0.992848 | 3.150876  |
| H | 1.807347  | -2.351778 | 2.200484  |
| H | -0.619223 | -3.071752 | -1.437620 |
| H | 1.557218  | -3.008198 | -1.530136 |
| H | -3.992099 | 1.543394  | -0.304918 |
| H | -2.236152 | 1.712465  | -0.589084 |
| H | -2.864253 | 1.701261  | 1.041201  |
| H | -3.842002 | -2.060648 | 0.526811  |
| H | -4.699141 | -0.961047 | -0.569525 |
| H | -4.684250 | -0.617074 | 1.142852  |

Geometry of complex: 5C

-----

33

Stoichiometry = C<sub>8</sub>H<sub>20</sub>IrOP<sub>3</sub>

|    |           |           |           |
|----|-----------|-----------|-----------|
| C  | 0.337815  | 1.064590  | 1.448017  |
| Ir | -0.598502 | 0.049423  | -0.014556 |
| O  | 1.412519  | -1.279238 | 0.021996  |
| C  | 2.622202  | -0.873135 | 0.056793  |
| C  | 3.414600  | -0.856690 | -1.221735 |
| C  | 1.553816  | 1.680670  | 1.298167  |
| C  | 2.266147  | 1.792494  | 0.076184  |
| C  | 1.616327  | 1.707061  | -1.182227 |
| C  | 0.409747  | 1.094959  | -1.406198 |
| P  | -1.185788 | -1.422957 | -1.820219 |
| P  | -1.275207 | -1.460699 | 1.727519  |
| P  | -2.285925 | 1.545210  | -0.041176 |
| C  | 3.349210  | -0.884301 | 1.373659  |
| H  | 2.153715  | 2.108787  | -2.036164 |
| H  | 2.047297  | 2.063859  | 2.186435  |
| H  | -0.109008 | 1.104317  | 2.444149  |
| H  | 3.251016  | 2.241935  | 0.105787  |
| H  | 4.248660  | -0.275289 | 1.354341  |
| H  | 3.713222  | -1.881633 | -1.466568 |
| H  | 4.311607  | -0.248705 | -1.144212 |
| H  | 2.788179  | -0.488312 | -2.029339 |
| H  | 3.635670  | -1.914377 | 1.611374  |
| H  | 2.682724  | -0.532835 | 2.156346  |
| H  | -0.318869 | -2.542548 | -1.931207 |
| H  | -1.033442 | -0.896021 | -3.131060 |
| H  | -2.425220 | -2.105039 | -2.008518 |
| H  | -3.647910 | 1.140560  | -0.079752 |
| H  | -2.280801 | 2.466983  | -1.116964 |
| H  | -2.335417 | 2.443972  | 1.052802  |
| H  | -0.414390 | -2.582870 | 1.858198  |
| H  | -2.522192 | -2.145952 | 1.838608  |
| H  | -1.189353 | -0.961836 | 3.055277  |
| H  | 0.013640  | 1.156098  | -2.422500 |

Geometry of complex: 50

32

Stoichiometry = C7H19IrO2P3

|    |           |           |           |
|----|-----------|-----------|-----------|
| H  | -2.192533 | -0.118313 | -2.762347 |
| C  | -1.648741 | -0.456929 | -1.887799 |
| C  | -1.494108 | -2.148097 | -0.077191 |
| H  | -1.960277 | -3.092271 | 0.173943  |
| C  | -0.273193 | -1.846366 | 0.405047  |
| O  | -0.435622 | 0.005250  | -1.795158 |
| C  | -2.275358 | -1.262531 | -0.942415 |
| Ir | 0.535719  | -0.029665 | 0.016712  |
| P  | 1.165918  | 2.266193  | -0.593142 |
| H  | 0.241743  | -2.587823 | 1.010659  |
| C  | -2.500757 | 0.509803  | 0.438429  |
| H  | -3.283065 | -1.567245 | -1.183242 |
| H  | -4.108968 | -0.699976 | 1.227355  |
| P  | 1.325170  | 0.038957  | 2.197103  |
| P  | 2.323989  | -1.106564 | -0.953154 |
| O  | -1.258598 | 0.893467  | 0.622149  |
| C  | -3.172809 | -0.252951 | 1.546889  |
| C  | -3.373366 | 1.458261  | -0.345574 |
| H  | -3.695035 | 2.251902  | 0.332698  |
| H  | -4.264804 | 0.970526  | -0.728355 |
| H  | -2.823187 | 1.920159  | -1.158629 |
| H  | -3.396495 | 0.466415  | 2.338981  |
| H  | -2.519426 | -1.013949 | 1.957314  |
| H  | 0.449950  | 3.259308  | 0.113736  |
| H  | 0.795017  | 2.566251  | -1.923827 |
| H  | 2.473619  | 2.810373  | -0.553796 |
| H  | 3.602983  | -0.504616 | -0.935809 |
| H  | 2.115274  | -1.323628 | -2.332113 |
| H  | 2.613975  | -2.406923 | -0.485505 |
| H  | 0.446024  | 0.740778  | 3.051216  |
| H  | 2.567290  | 0.640404  | 2.506453  |
| H  | 1.445136  | -1.202867 | 2.862131  |

Geometry of complex: 5S

32

Stoichiometry = C7H19IrOP3S1

|    |           |           |           |
|----|-----------|-----------|-----------|
| H  | -2.699071 | -0.400588 | -2.608848 |
| C  | -1.985547 | -0.629068 | -1.829410 |
| C  | -1.521498 | -2.125804 | 0.115833  |
| H  | -1.956656 | -3.072852 | 0.409749  |
| C  | -0.256054 | -1.832574 | 0.451391  |
| S  | -0.396960 | -0.057023 | -2.146496 |
| C  | -2.421228 | -1.250216 | -0.661835 |
| Ir | 0.576927  | -0.019799 | 0.058715  |
| P  | 1.264204  | 2.264438  | -0.489614 |
| H  | 0.308666  | -2.592139 | 0.988264  |
| C  | -2.476746 | 0.472801  | 0.519078  |
| H  | -3.461505 | -1.550084 | -0.671929 |
| H  | -3.971671 | -0.652082 | 1.615789  |
| P  | 1.193703  | 0.102774  | 2.313378  |
| P  | 2.464685  | -1.115315 | -0.701519 |
| O  | -1.228341 | 0.917130  | 0.547744  |
| C  | -3.010198 | -0.173378 | 1.777490  |
| C  | -3.444106 | 1.396025  | -0.186928 |

|   |           |           |           |
|---|-----------|-----------|-----------|
| H | -3.658461 | 2.232759  | 0.480210  |
| H | -4.385906 | 0.904046  | -0.414806 |
| H | -3.005403 | 1.798103  | -1.094288 |
| H | -3.153746 | 0.626489  | 2.507585  |
| H | -2.310790 | -0.892256 | 2.188023  |
| H | 0.211852  | 3.164857  | -0.211542 |
| H | 1.523404  | 2.562726  | -1.848146 |
| H | 2.357633  | 2.925018  | 0.124301  |
| H | 3.743385  | -0.616452 | -0.359054 |
| H | 2.568415  | -1.217004 | -2.106309 |
| H | 2.577635  | -2.468280 | -0.309853 |
| H | 0.260502  | 0.841273  | 3.074060  |
| H | 2.415556  | 0.699325  | 2.705647  |
| H | 1.244242  | -1.118187 | 3.024682  |

Geometry of complex: 6C

33

Stoichiometry = C8H20IrOP3

|    |           |           |           |
|----|-----------|-----------|-----------|
| C  | -0.619212 | 1.722629  | 0.543293  |
| Ir | -0.428771 | -0.278997 | 0.220756  |
| O  | 1.563521  | 0.057438  | -0.138334 |
| C  | 2.014117  | 1.162204  | -0.934016 |
| C  | 2.806716  | 0.597768  | -2.116484 |
| C  | 0.022925  | 2.564123  | -0.278620 |
| C  | 0.810522  | 2.015464  | -1.450831 |
| C  | -0.104461 | 1.158852  | -2.301968 |
| C  | -0.763270 | 0.133197  | -1.745200 |
| P  | 0.185165  | -2.514256 | -0.464247 |
| P  | 0.371346  | -0.459182 | 2.494477  |
| P  | -2.705046 | -0.528310 | 0.537221  |
| C  | 2.935951  | 2.022551  | -0.065079 |
| H  | -0.202708 | 1.401197  | -3.353575 |
| H  | 0.000018  | 3.637732  | -0.133362 |
| H  | -1.194392 | 2.119824  | 1.380022  |
| H  | 1.215590  | 2.834341  | -2.045064 |
| H  | 3.353271  | 2.860011  | -0.628003 |
| H  | 3.628991  | -0.009506 | -1.738960 |
| H  | 3.220184  | 1.393155  | -2.740008 |
| H  | 2.167067  | -0.033398 | -2.729407 |
| H  | 3.757566  | 1.408211  | 0.302316  |
| H  | 2.388844  | 2.411580  | 0.790795  |
| H  | 1.582605  | -2.550543 | -0.688414 |
| H  | -0.280556 | -2.977764 | -1.723543 |
| H  | 0.018044  | -3.724976 | 0.268255  |
| H  | -3.269843 | -1.584076 | 1.306005  |
| H  | -3.494983 | -0.665942 | -0.634815 |
| H  | -3.383298 | 0.565189  | 1.137928  |
| H  | 1.782383  | -0.343750 | 2.487528  |
| H  | 0.214961  | -1.559034 | 3.386778  |
| H  | 0.041346  | 0.582070  | 3.402476  |
| H  | -1.429601 | -0.475565 | -2.356857 |

Geometry of complex: 60

32

Stoichiometry = C7H19IrO2P3

|    |           |           |           |
|----|-----------|-----------|-----------|
| H  | -0.304165 | 1.298046  | -3.338569 |
| C  | -0.133179 | 1.122412  | -2.280128 |
| C  | -0.025886 | 2.559722  | -0.336969 |
| H  | -0.096156 | 3.635989  | -0.270354 |
| C  | -0.609632 | 1.739050  | 0.547876  |
| O  | -0.753950 | 0.161809  | -1.762942 |
| C  | 0.782003  | 1.991523  | -1.490845 |
| Ir | -0.402058 | -0.256914 | 0.252630  |
| P  | 0.182584  | -2.550946 | -0.392915 |
| H  | -1.166675 | 2.163272  | 1.378137  |
| C  | 2.009227  | 1.138216  | -0.981219 |
| H  | 1.158246  | 2.784643  | -2.129042 |
| H  | 3.308300  | 2.863793  | -0.695295 |
| P  | 0.333362  | -0.464613 | 2.427803  |
| P  | -2.699496 | -0.573052 | 0.616974  |
| O  | 1.564101  | 0.019338  | -0.204954 |
| C  | 2.911221  | 2.023032  | -0.126816 |
| C  | 2.782136  | 0.590748  | -2.183905 |
| H  | 3.626646  | 0.007205  | -1.826000 |
| H  | 3.164259  | 1.391535  | -2.816638 |
| H  | 2.161638  | -0.071781 | -2.788221 |
| H  | 3.747855  | 1.425015  | 0.228104  |
| H  | 2.374010  | 2.406348  | 0.736770  |
| H  | 1.500102  | -2.906028 | -0.028298 |
| H  | 0.248277  | -2.710670 | -1.795738 |
| H  | -0.525326 | -3.725402 | -0.036024 |
| H  | -3.173093 | -1.786775 | 1.168017  |
| H  | -3.474111 | -0.492616 | -0.563080 |
| H  | -3.362013 | 0.367658  | 1.439120  |
| H  | 1.743007  | -0.410580 | 2.449592  |
| H  | 0.044923  | -1.623343 | 3.185152  |
| H  | -0.040581 | 0.557872  | 3.327101  |

Geometry of complex: 6S

32

Stoichiometry = C7H19IrOP3S1

|    |           |           |           |
|----|-----------|-----------|-----------|
| H  | 0.050196  | 1.699456  | -3.399942 |
| C  | 0.050772  | 1.378634  | -2.366078 |
| C  | 0.035502  | 2.575558  | -0.238455 |
| H  | -0.046784 | 3.647531  | -0.124088 |
| C  | -0.599210 | 1.721853  | 0.574033  |
| S  | -0.926009 | 0.075669  | -2.009875 |
| C  | 0.905344  | 2.088137  | -1.384882 |
| Ir | -0.399908 | -0.283937 | 0.302892  |
| P  | 0.212219  | -2.600983 | -0.201392 |
| H  | -1.200143 | 2.126360  | 1.384521  |
| C  | 2.069049  | 1.142082  | -0.872461 |
| H  | 1.376087  | 2.933360  | -1.879546 |
| H  | 3.370603  | 2.803693  | -0.326307 |
| P  | 0.474631  | -0.385859 | 2.464255  |
| P  | -2.650604 | -0.608531 | 0.878306  |
| O  | 1.551952  | -0.035366 | -0.255530 |
| C  | 2.918598  | 1.922730  | 0.128672  |
| C  | 2.924219  | 0.696815  | -2.060409 |
| H  | 3.732908  | 0.066252  | -1.699027 |

|   |           |           |           |
|---|-----------|-----------|-----------|
| H | 3.362072  | 1.547493  | -2.582369 |
| H | 2.339860  | 0.108540  | -2.766635 |
| H | 3.718126  | 1.274795  | 0.482518  |
| H | 2.325910  | 2.240752  | 0.982910  |
| H | 1.567713  | -2.848227 | 0.108315  |
| H | 0.193202  | -2.947294 | -1.571993 |
| H | -0.412662 | -3.744726 | 0.354910  |
| H | -3.008043 | -1.717361 | 1.681790  |
| H | -3.560201 | -0.762364 | -0.193990 |
| H | -3.265970 | 0.445590  | 1.593594  |
| H | 1.883715  | -0.409061 | 2.399802  |
| H | 0.181866  | -1.469649 | 3.325949  |
| H | 0.215627  | 0.715958  | 3.309120  |
